# Supplementary material
Source: publisher site journal article supplement (https://www.dovepress.com/article/379737)
Supplement: Supplementary file 1 [file get_supplementary_file.php]

# Default Report

WCM Shared Leadership Values

May 17, 2021 8:54 AM MDT

Q1 - Rank the following as they align with your personal leadership values:

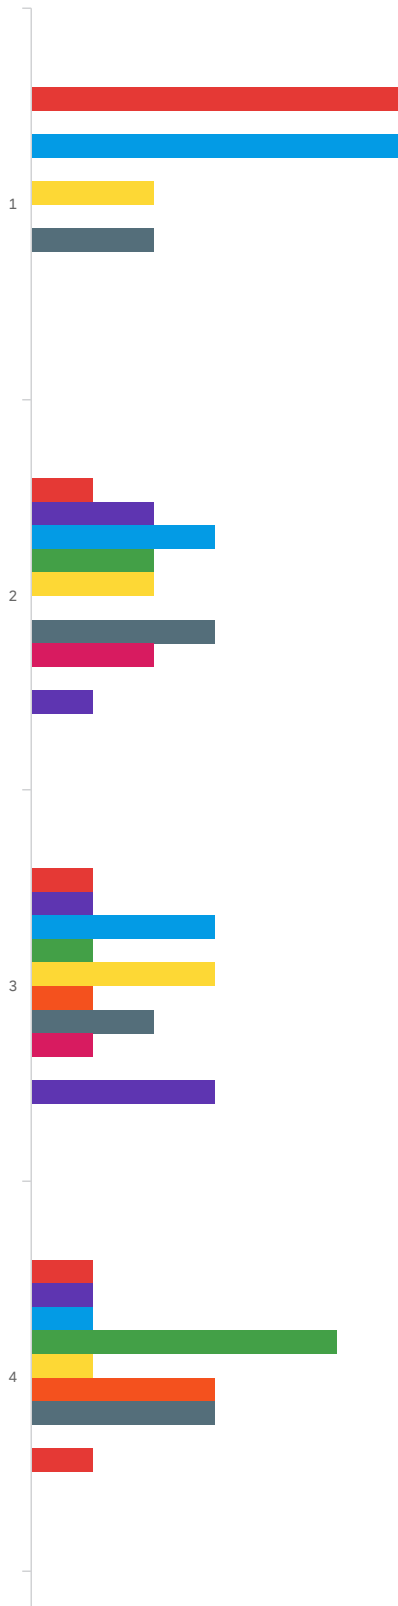

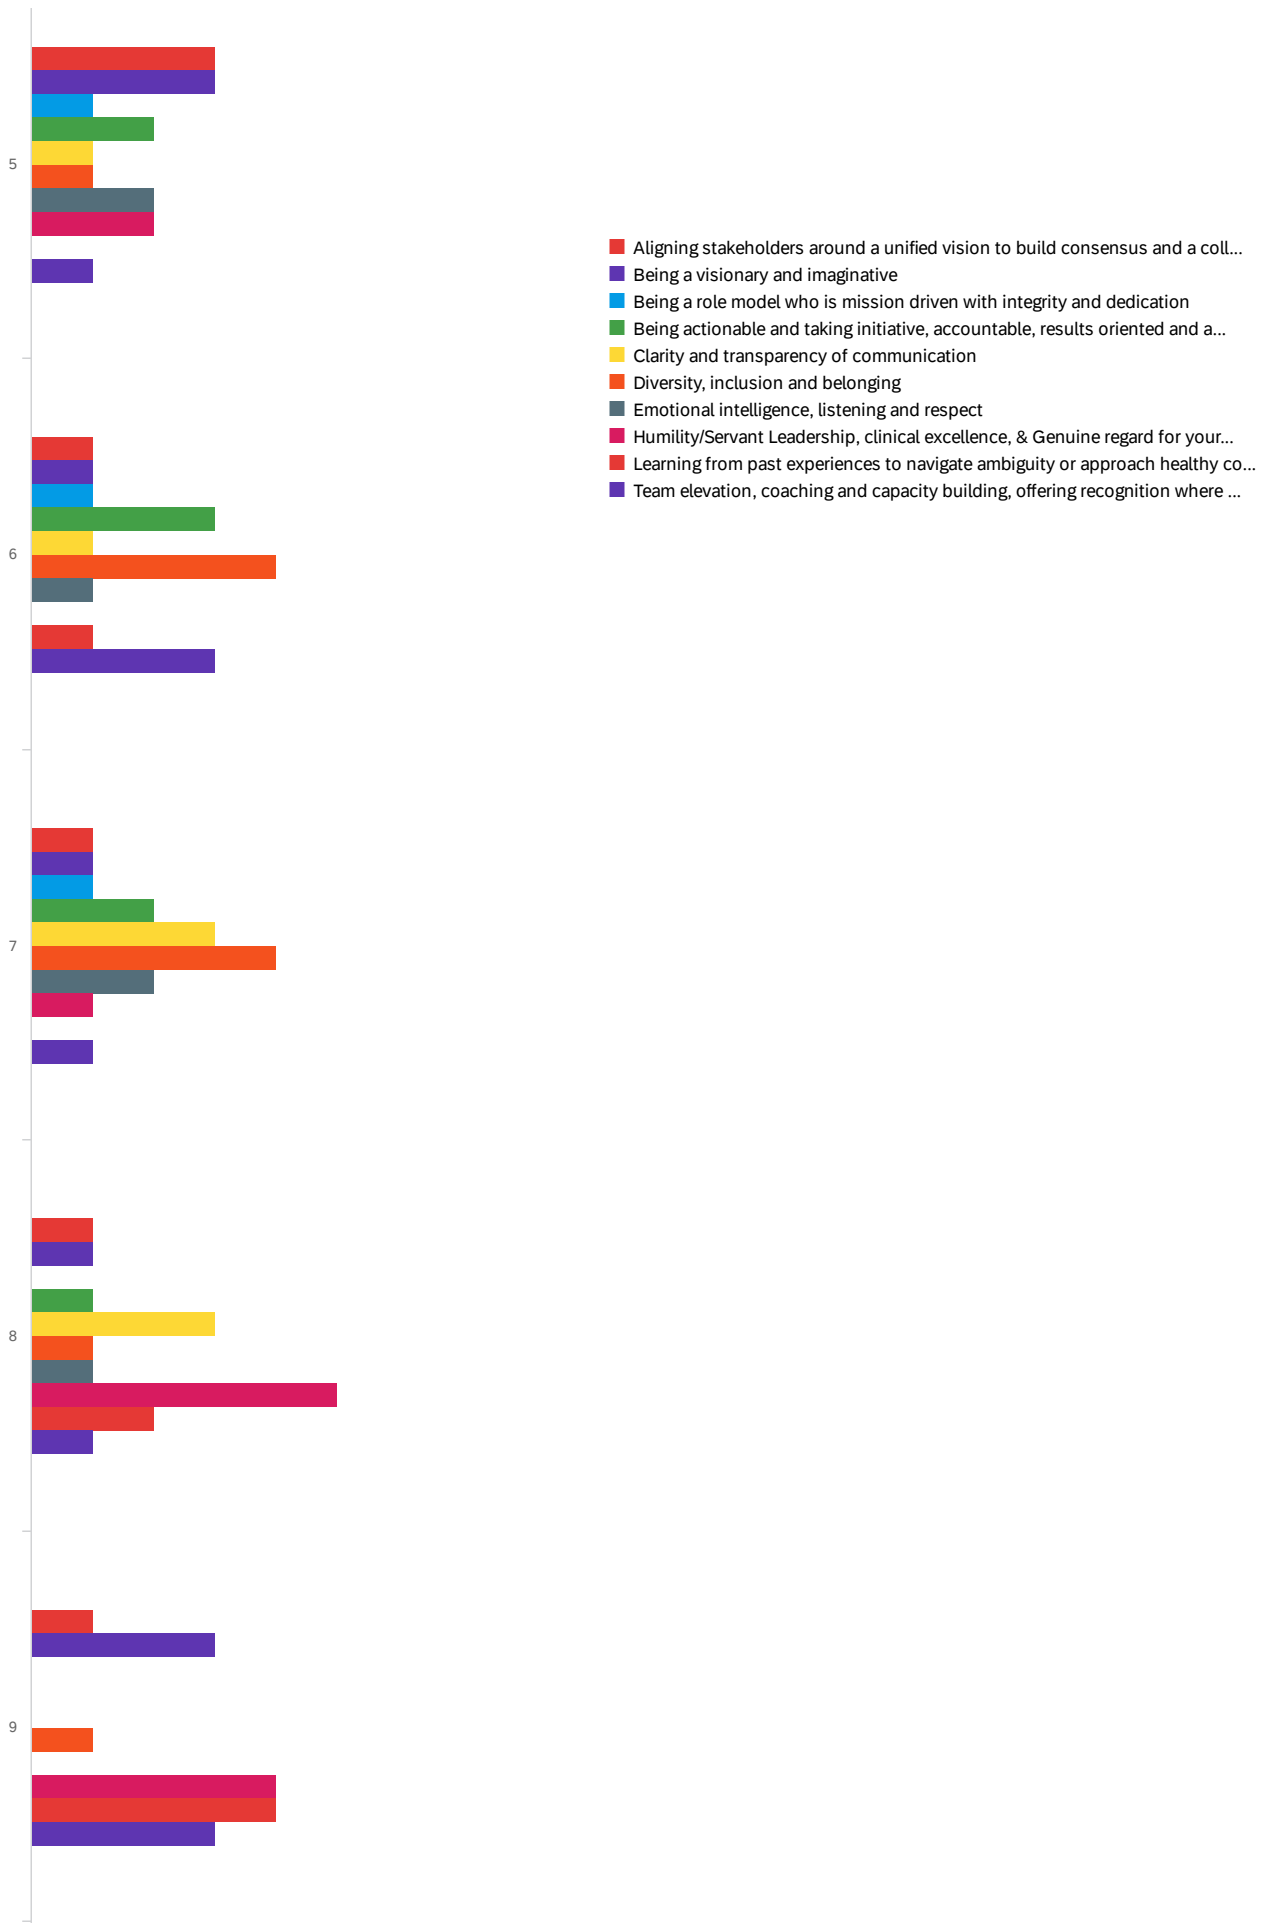

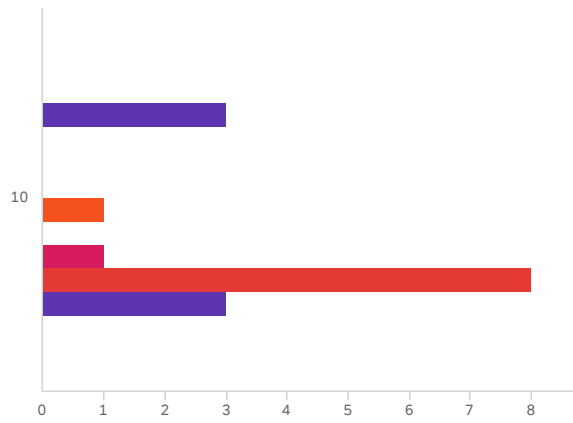

| #  | Field                                                                                                                     | Minimum | Maximum | Mean | Std Deviation | Variance | Count |
|----|---------------------------------------------------------------------------------------------------------------------------|---------|---------|------|---------------|----------|-------|
| 1  | Aligning stakeholders around a unified vision to build consensus and a collaborative, supportive environment              | 1.00    | 9.00    | 3.75 | 2.68          | 7.19     | 16    |
| 2  | Being a visionary and imaginative                                                                                         | 2.00    | 10.00   | 6.50 | 2.78          | 7.75     | 16    |
| 3  | Being a role model who is mission driven with integrity and dedication                                                    | 1.00    | 7.00    | 2.69 | 1.86          | 3.46     | 16    |
| 4  | Being actionable and taking initiative, accountable, results oriented and able to make decisions that may require courage | 2.00    | 8.00    | 4.81 | 1.70          | 2.90     | 16    |
| 5  | Clarity and transparency of communication                                                                                 | 1.00    | 8.00    | 4.69 | 2.52          | 6.34     | 16    |
| 6  | Diversity, inclusion and belonging                                                                                        | 3.00    | 10.00   | 6.19 | 1.84          | 3.40     | 16    |
| 7  | Emotional intelligence, listening and respect                                                                             | 1.00    | 8.00    | 4.00 | 2.12          | 4.50     | 16    |
| 8  | Humility/Servant Leadership, clinical excellence, & Genuine regard for your institution                                   | 2.00    | 10.00   | 6.88 | 2.55          | 6.48     | 16    |
| 9  | Learning from past experiences to navigate ambiguity or approach healthy conflict                                         | 4.00    | 10.00   | 8.88 | 1.65          | 2.73     | 16    |
| 10 | Team elevation, coaching and capacity building, offering recognition where due and delegating                             | 2.00    | 10.00   | 6.63 | 2.71          | 7.36     | 16    |

| # | Field                                                                                                        | 1        | 2       | 3       | 4       | 5        | 6       | 7       | 8     |
|---|--------------------------------------------------------------------------------------------------------------|----------|---------|---------|---------|----------|---------|---------|-------|
| 1 | Aligning stakeholders around a unified vision to build consensus and a collaborative, supportive environment | 37.50% 6 | 6.25% 1 | 6.25% 1 | 6.25% 1 | 18.75% 3 | 6.25% 1 | 6.25% 1 | 6.25% |

| #  | Field                                                                                                                     | 1        | 2        | 3        | 4        | 5        | 6        | 7        | 8     |
|----|---------------------------------------------------------------------------------------------------------------------------|----------|----------|----------|----------|----------|----------|----------|-------|
| 2  | Being a visionary and imaginative                                                                                         | 0.00% 0  | 12.50% 2 | 6.25% 1  | 6.25% 1  | 18.75% 3 | 6.25% 1  | 6.25% 1  | 6.25  |
| 3  | Being a role model who is mission driven with integrity and dedication                                                    | 37.50% 6 | 18.75% 3 | 18.75% 3 | 6.25% 1  | 6.25% 1  | 6.25% 1  | 6.25% 1  | 0.00  |
| 4  | Being actionable and taking initiative, accountable, results oriented and able to make decisions that may require courage | 0.00% 0  | 12.50% 2 | 6.25% 1  | 31.25% 5 | 12.50% 2 | 18.75% 3 | 12.50% 2 | 6.25  |
| 5  | Clarity and transparency of communication                                                                                 | 12.50% 2 | 12.50% 2 | 18.75% 3 | 6.25% 1  | 6.25% 1  | 6.25% 1  | 18.75% 3 | 18.75 |
| 6  | Diversity, inclusion and belonging                                                                                        | 0.00% 0  | 0.00% 0  | 6.25% 1  | 18.75% 3 | 6.25% 1  | 25.00% 4 | 25.00% 4 | 6.25  |
| 7  | Emotional intelligence, listening and respect                                                                             | 12.50% 2 | 18.75% 3 | 12.50% 2 | 18.75% 3 | 12.50% 2 | 6.25% 1  | 12.50% 2 | 6.25  |
| 8  | Humility/Servant Leadership, clinical excellence, & Genuine regard for your institution                                   | 0.00% 0  | 12.50% 2 | 6.25% 1  | 0.00% 0  | 12.50% 2 | 0.00% 0  | 6.25% 1  | 31.25 |
| 9  | Learning from past experiences to navigate ambiguity or approach healthy conflict                                         | 0.00% 0  | 0.00% 0  | 0.00% 0  | 6.25% 1  | 0.00% 0  | 6.25% 1  | 0.00% 0  | 12.50 |
| 10 | Team elevation, coaching and capacity building, offering recognition where due and delegating                             | 0.00% 0  | 6.25% 1  | 18.75% 3 | 0.00% 0  | 6.25% 1  | 18.75% 3 | 6.25% 1  | 6.25  |

Showing rows 1 - 10 of 10

Q4 - Rank the following as they align with the shared values of WCM leadership:

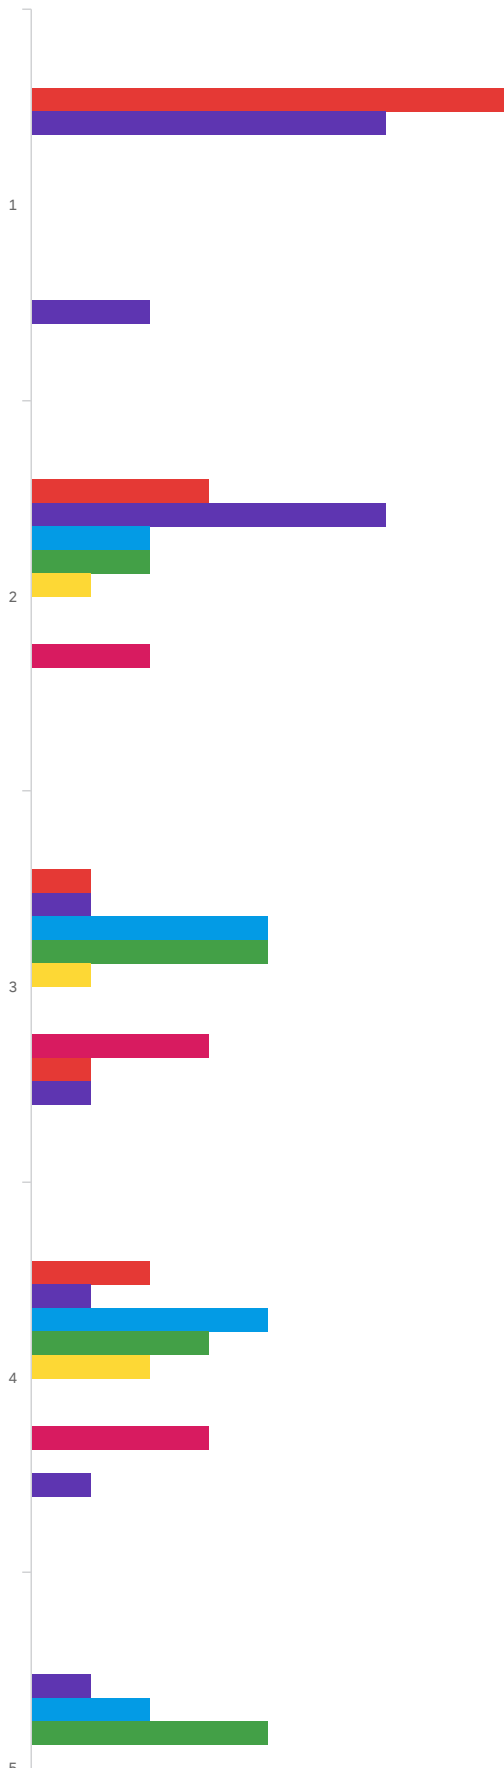



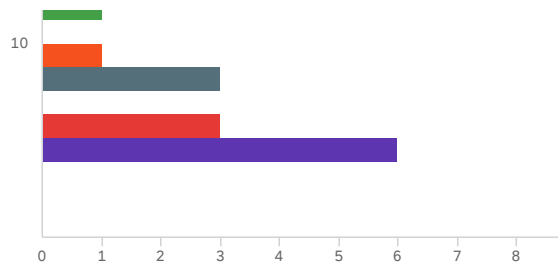

| #  | Field                                                                                         | Minimum | Maximum | Mean | Std Deviation | Variance | Count |
|----|-----------------------------------------------------------------------------------------------|---------|---------|------|---------------|----------|-------|
| 1  | Consensus around and commitment to a unified mission                                          | 1.00    | 10.00   | 2.56 | 2.40          | 5.75     | 16    |
| 2  | Collaboration, collegiality, camaraderie and compromise                                       | 1.00    | 6.00    | 2.25 | 1.48          | 2.19     | 16    |
| 3  | Diversity and Equity                                                                          | 2.00    | 10.00   | 4.50 | 2.06          | 4.25     | 16    |
| 4  | Education & Research                                                                          | 2.00    | 10.00   | 4.56 | 2.12          | 4.50     | 16    |
| 5  | Executive leadership including autonomy to make informed decision by synthesizing information | 2.00    | 9.00    | 6.25 | 1.95          | 3.81     | 16    |
| 6  | Imaginative                                                                                   | 5.00    | 10.00   | 7.13 | 1.45          | 2.11     | 16    |
| 7  | Openness, willingness to be vocal                                                             | 5.00    | 10.00   | 8.25 | 1.48          | 2.19     | 16    |
| 8  | Respect                                                                                       | 2.00    | 8.00    | 4.69 | 1.83          | 3.34     | 16    |
| 9  | Servant Leadership including mentorship                                                       | 3.00    | 10.00   | 7.50 | 2.03          | 4.13     | 16    |
| 10 | Willingness to initiate change and evolve by being reflective and striving for excellence     | 1.00    | 10.00   | 7.31 | 3.23          | 10.46    | 16    |

| # | Field                                                   | 1        | 2        | 3        | 4        | 5        | 6       | 7        | 8     |
|---|---------------------------------------------------------|----------|----------|----------|----------|----------|---------|----------|-------|
| 1 | Consensus around and commitment to a unified mission    | 50.00% 8 | 18.75% 3 | 6.25% 1  | 12.50% 2 | 0.00% 0  | 6.25% 1 | 0.00% 0  | 0.00% |
| 2 | Collaboration, collegiality, camaraderie and compromise | 37.50% 6 | 37.50% 6 | 6.25% 1  | 6.25% 1  | 6.25% 1  | 6.25% 1 | 0.00% 0  | 0.00% |
| 3 | Diversity and Equity                                    | 0.00% 0  | 12.50% 2 | 25.00% 4 | 25.00% 4 | 12.50% 2 | 6.25% 1 | 12.50% 2 | 0.00% |
| 4 | Education & Research                                    | 0.00% 0  | 12.50% 2 | 25.00% 4 | 18.75% 3 | 25.00% 4 | 0.00% 0 | 6.25% 1  | 6.25% |

| #  | Field                                                                                         | 1        | 2        | 3        | 4        | 5        | 6        | 7        | 8     |
|----|-----------------------------------------------------------------------------------------------|----------|----------|----------|----------|----------|----------|----------|-------|
| 5  | Executive leadership including autonomy to make informed decision by synthesizing information | 0.00% 0  | 6.25% 1  | 6.25% 1  | 12.50% 2 | 0.00% 0  | 18.75% 3 | 25.00% 4 | 25.00 |
| 6  | Imaginative                                                                                   | 0.00% 0  | 0.00% 0  | 0.00% 0  | 0.00% 0  | 18.75% 3 | 12.50% 2 | 31.25% 5 | 18.75 |
| 7  | Openness, willingness to be vocal                                                             | 0.00% 0  | 0.00% 0  | 0.00% 0  | 0.00% 0  | 6.25% 1  | 12.50% 2 | 6.25% 1  | 18.75 |
| 8  | Respect                                                                                       | 0.00% 0  | 12.50% 2 | 18.75% 3 | 18.75% 3 | 18.75% 3 | 6.25% 1  | 18.75% 3 | 6.25  |
| 9  | Servant Leadership including mentorship                                                       | 0.00% 0  | 0.00% 0  | 6.25% 1  | 0.00% 0  | 6.25% 1  | 31.25% 5 | 0.00% 0  | 12.50 |
| 10 | Willingness to initiate change and evolve by being reflective and striving for excellence     | 12.50% 2 | 0.00% 0  | 6.25% 1  | 6.25% 1  | 6.25% 1  | 0.00% 0  | 0.00% 0  | 12.50 |

Showing rows 1 - 10 of 10



Q2 - Rank the following in importance as competencies that healthcare leaders need:

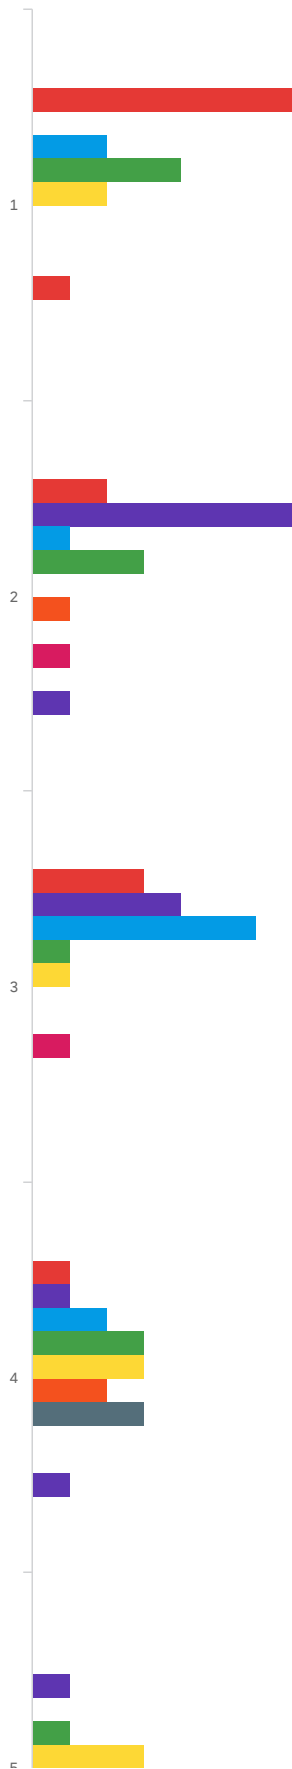

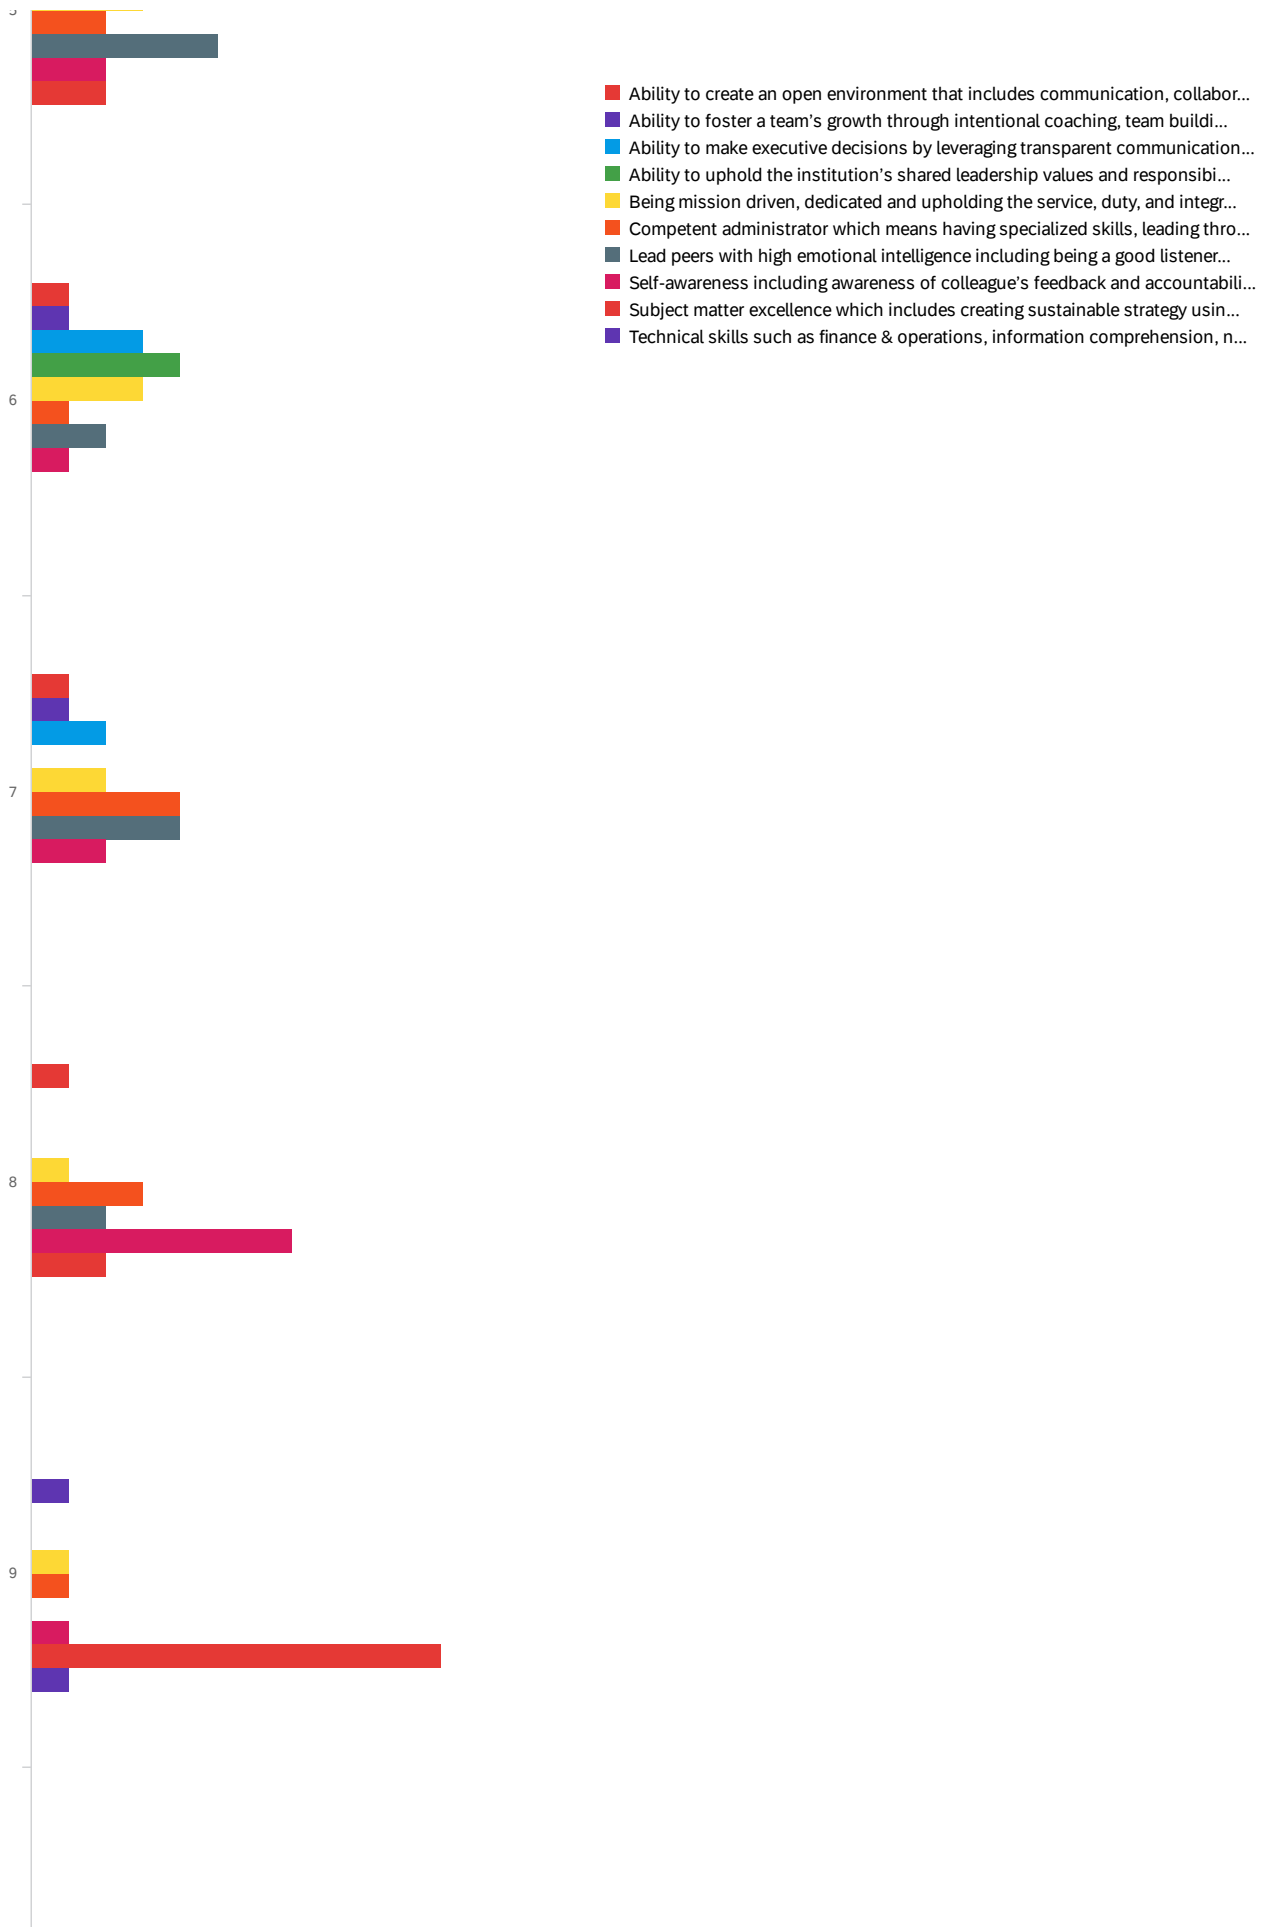

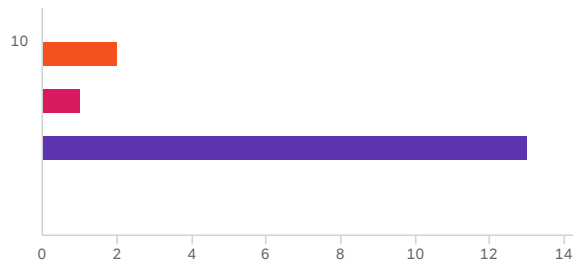

| #  | Field                                                                                                                                                                                         | Minimum | Maximum | Mean | Std Deviation | Variance | Count |
|----|-----------------------------------------------------------------------------------------------------------------------------------------------------------------------------------------------|---------|---------|------|---------------|----------|-------|
| 1  | Ability to create an open environment that includes communication, collaboration and consensus building.                                                                                      | 1.00    | 8.00    | 2.81 | 2.24          | 5.03     | 16    |
| 2  | Ability to foster a team's growth through intentional coaching, team building and trust building.                                                                                             | 2.00    | 9.00    | 3.56 | 2.06          | 4.25     | 16    |
| 3  | Ability to make executive decisions by leveraging transparent communication, being attentive & engaged in team discussions, and being meticulous (detail or data oriented).                   | 1.00    | 7.00    | 3.88 | 1.90          | 3.61     | 16    |
| 4  | Ability to uphold the institution's shared leadership values and responsibilities.                                                                                                            | 1.00    | 6.00    | 3.38 | 1.93          | 3.73     | 16    |
| 5  | Being mission driven, dedicated and upholding the service, duty, and integrity of the institution.                                                                                            | 1.00    | 9.00    | 5.06 | 2.16          | 4.68     | 16    |
| 6  | Competent administrator which means having specialized skills, leading through uncertainty (i.e change management), high acuity to learn on the job, and gaining/seeking leadership training. | 2.00    | 10.00   | 6.69 | 2.17          | 4.71     | 16    |
| 7  | Lead peers with high emotional intelligence including being a good listener and being pro-staff (perspective taking of staff members).                                                        | 4.00    | 8.00    | 5.81 | 1.33          | 1.78     | 16    |
| 8  | Self-awareness including awareness of colleague's feedback and accountability.                                                                                                                | 2.00    | 10.00   | 6.88 | 2.09          | 4.36     | 16    |
| 9  | Subject matter excellence which includes creating sustainable strategy using scenario planning.                                                                                               | 1.00    | 9.00    | 7.88 | 2.20          | 4.86     | 16    |
| 10 | Technical skills such as finance & operations, information comprehension, negotiation, and presentation style.                                                                                | 2.00    | 10.00   | 9.06 | 2.33          | 5.43     | 16    |

| # | Field                                                                                                    | 1        | 2        | 3        | 4       | 5       | 6       | 7       | 8     |
|---|----------------------------------------------------------------------------------------------------------|----------|----------|----------|---------|---------|---------|---------|-------|
| 1 | Ability to create an open environment that includes communication, collaboration and consensus building. | 43.75% 7 | 12.50% 2 | 18.75% 3 | 6.25% 1 | 0.00% 0 | 6.25% 1 | 6.25% 1 | 6.25% |

| # | Field                                                                                                                                                                                         | 1        | 2        | 3        | 4        | 5        | 6        | 7        | 8      |
|---|-----------------------------------------------------------------------------------------------------------------------------------------------------------------------------------------------|----------|----------|----------|----------|----------|----------|----------|--------|
| 2 | Ability to foster a team's growth through intentional coaching, team building and trust building.                                                                                             | 0.00% 0  | 43.75% 7 | 25.00% 4 | 6.25% 1  | 6.25% 1  | 6.25% 1  | 6.25% 1  | 0.00%  |
| 3 | Ability to make executive decisions by leveraging transparent communication, being attentive & engaged in team discussions, and being meticulous (detail or data oriented).                   | 12.50% 2 | 6.25% 1  | 37.50% 6 | 12.50% 2 | 0.00% 0  | 18.75% 3 | 12.50% 2 | 0.00%  |
| 4 | Ability to uphold the institution's shared leadership values and responsibilities.                                                                                                            | 25.00% 4 | 18.75% 3 | 6.25% 1  | 18.75% 3 | 6.25% 1  | 25.00% 4 | 0.00% 0  | 0.00%  |
| 5 | Being mission driven, dedicated and upholding the service, duty, and integrity of the institution.                                                                                            | 12.50% 2 | 0.00% 0  | 6.25% 1  | 18.75% 3 | 18.75% 3 | 18.75% 3 | 12.50% 2 | 6.25%  |
| 6 | Competent administrator which means having specialized skills, leading through uncertainty (i.e change management), high acuity to learn on the job, and gaining/seeking leadership training. | 0.00% 0  | 6.25% 1  | 0.00% 0  | 12.50% 2 | 12.50% 2 | 6.25% 1  | 25.00% 4 | 18.75% |
| 7 | Lead peers with high emotional intelligence including being a good listener and being pro-staff (perspective taking of staff members).                                                        | 0.00% 0  | 0.00% 0  | 0.00% 0  | 18.75% 3 | 31.25% 5 | 12.50% 2 | 25.00% 4 | 12.50% |
| 8 | Self-awareness including awareness of colleague's feedback and accountability.                                                                                                                | 0.00% 0  | 6.25% 1  | 6.25% 1  | 0.00% 0  | 12.50% 2 | 6.25% 1  | 12.50% 2 | 43.75% |
| 9 | Subject matter excellence which includes creating sustainable strategy using scenario planning.                                                                                               | 6.25% 1  | 0.00% 0  | 0.00% 0  | 0.00% 0  | 12.50% 2 | 0.00% 0  | 0.00% 0  | 12.50% |

| #  | Field                                                                                                          | 1       | 2       | 3       | 4       | 5       | 6       | 7       | 8    |
|----|----------------------------------------------------------------------------------------------------------------|---------|---------|---------|---------|---------|---------|---------|------|
| 10 | Technical skills such as finance & operations, information comprehension, negotiation, and presentation style. | 0.00% 0 | 6.25% 1 | 0.00% 0 | 6.25% 1 | 0.00% 0 | 0.00% 0 | 0.00% 0 | 0.00 |

Showing rows 1 - 10 of 10

**End of Report**
